# Supplementary material for: Web-Based Nomograms for Overall Survival and Cancer-Specific Survival of Bladder Cancer Patients with Bone Metastasis: A Retrospective Cohort Study from SEER Database
Source: MDPI journal article supplement (doi:10.3390/jcm12020726), 2023-01-16
Supplement: s1 [file s1]

## Supplementary contents

### Supplementary material A

Supplementary Table S1. Characteristics of patients stratified by survival outcome in whole dataset.

Supplementary Table S2. Characteristics of patients before and after imputation in whole dataset.

Supplementary Table S3. Univariable cox proportion hazards regression analyses for overall survival (OS) and cancer-specific survival (CSS) in training dataset.

Supplementary Table S4. Final selected variables for overall survival (OS) and cancer-specific survival (CSS) in stepwise, backward, multivariable cox proportion hazards regression analyses.

Supplementary Table S5. Score assignment for variables included in the nomograms of overall survival (OS) and cancer-specific survival (CSS).

Supplementary Figure S1. Cumulative incidences curves of cancer and noncancer death in whole dataset.

Supplementary Figure S2. Frequency distribution histogram and density curve of age in whole dataset.

Supplementary Figure S3. Pattern of missing values in whole dataset before imputation.

Supplementary Figure S4. Proportion and combinations of missing values in whole dataset before imputation.

Supplementary Figure S5. Evaluation of the nomogram on training dataset for overall survival (OS). (A) 3-, 6- and 12-month Calibration plots of Nomogram. (B) 3-month (C) 6-month and (D) 12-month Area Under the Curve (AUC) for Receiver Operating Characteristic (ROC) curves of Nomogram, Chemotherapy, Liver metastasis and Primary site surgery. (E) Overall Concordance Index (c-index) of Nomogram, Chemotherapy, Liver metastasis and Primary site surgery. (F) Overall AUC of Nomogram, Chemotherapy, Liver metastasis and Primary site surgery. (G) 3-, 6- and 12-month Decision Curve Analysis (DCA) of Nomogram, Chemotherapy, Liver metastasis and Primary site surgery.

Supplementary Figure S6. Evaluation of the nomogram on training dataset for cancer-specific survival (CSS). (A) 3-, 6- and 12-month Calibration plots of Nomogram. (B) 3-month (C) 6-month and (D) 12-month Area Under the Curve (AUC) for Receiver Operating Characteristic (ROC) curves of Nomogram, Chemotherapy, Liver metastasis and Primary site surgery. (E) Overall Concordance Index (c-index) of Nomogram, Chemotherapy, Liver metastasis and Primary site surgery. (F) Overall AUC of Nomogram, Chemotherapy, Liver metastasis and Primary site surgery. (G) 3-, 6- and 12-month Decision Curve Analysis (DCA) of Nomogram, Chemotherapy, Liver metastasis and Primary site surgery.

Supplementary Figure S7. The prediction error curves for different models based on the integrated Brier score (IBS). (A) Training dataset of overall survival (OS). (B) Internal validation dataset of overall survival (OS). (C) External testing dataset of overall survival (OS). (D) Training dataset of cancer-specific survival (CSS). (E) Internal validation dataset of cancer-specific survival (CSS). (F) External testing dataset of cancer-specific survival (CSS).

Supplementary Figure S8. Cut-off values of nomogram total points calculated by X-tile. (A) Training dataset of Overall survival (OS). (B) Training dataset of cancer-specific survival (CSS).

Supplementary Figure S9. Kaplan-Meier survival curves of patients stratified by risk score and scatterplot of the risk score for (A, C) Training dataset of overall survival (OS). (B, D) Training dataset of cancer-specific survival (CSS).

Supplementary Figure S10. Kaplan–Meier survival curves of patients stratified by risk score and scatterplot of the risk score for (A, E) Internal validation of overall survival (OS). (B, F) External testing dataset of overall survival (OS). (C, G) Internal validation dataset of cancer-specific survival (CSS). (D, H) External testing dataset of cancer-specific survival (CSS).

Supplementary Figure S11. Kaplan–Meier curves of patients with different surgery in low- (A-C) and high-risk (D-F) group for Overall survival (OS) and low- (G-I) and high-risk (J-L) group for Cancer-specific survival (CSS).

Supplementary Figure S12. Kaplan–Meier curves of patients with different chemotherapy in low- (A-C) and high-risk (D-F) group for Overall survival (OS) and low- (G-I) and high-risk (J-L) group for Cancer-specific survival (CSS).

Supplementary Figure S13. The web survival rate calculator for (A) Overall survival (OS). (B) Cancer-specific survival (CSS).

Supplementary Figure S14. The web survival rate calculator estimated overall survival (OS) of a hypothetical patient (Married; No brain metastasis, liver or lung metastasis) based on different treatment strategy. (A) Survival curves of different treatments. (B) 12-month survival probability with 95%CI of different treatments. Abbreviations: CC, complete cystectomy; CT, chemotherapy.

Supplementary Figure S15. The web survival rate calculator estimated cancer-specific survival (CSS) of a hypothetical patient (Married; No brain metastasis, liver or lung metastasis) based on different treatment strategy. (A) Survival curves of different treatments. (B) 12-month survival probability with 95%CI of different treatments. Abbreviations: CC, complete cystectomy; CT, chemotherapy.

### **Supplementary material B**

STROBE Statement for Checklist of items that should be included in reports of cohort studies

### **Supplementary material C**

TRIPOD Checklist for Prediction Model Development and Validation

# Supplementary material A

**Supplementary Table S1. Characteristics of patients stratified by survival outcome in whole dataset.**

| Characteristics             | Level                                 | Overall (N = 1438) | Alive (N = 77) | Dead of cancer (N = 1274) | Dead of other causes (N = 87) | <i>p</i> value |
|-----------------------------|---------------------------------------|--------------------|----------------|---------------------------|-------------------------------|----------------|
| Survival.months (mean (SD)) |                                       | 7.89 (10.85)       | 28.68 (21.31)  | 6.62 (8.03)               | 8.10 (14.19)                  | <0.001         |
| OS (%)                      | Alive                                 | 77 (5.4)           | 77 (100.0)     | 0 (0.0)                   | 0 (0.0)                       | <0.001         |
|                             | Dead                                  | 1361 (94.6)        | 0 (0.0)        | 1274 (100.0)              | 87 (100.0)                    |                |
| Year.of.diagnosis (%)       | 2010                                  | 159 (11.1)         | 1 (1.3)        | 148 (11.6)                | 10 (11.5)                     | <0.001         |
|                             | 2011                                  | 149 (10.4)         | 1 (1.3)        | 141 (11.1)                | 7 (8.0)                       |                |
|                             | 2012                                  | 192 (13.4)         | 3 (3.9)        | 174 (13.7)                | 15 (17.2)                     |                |
|                             | 2013                                  | 162 (11.3)         | 1 (1.3)        | 151 (11.9)                | 10 (11.5)                     |                |
|                             | 2014                                  | 174 (12.1)         | 10 (13.0)      | 158 (12.4)                | 6 (6.9)                       |                |
|                             | 2015                                  | 198 (13.8)         | 10 (13.0)      | 175 (13.7)                | 13 (14.9)                     |                |
|                             | 2016                                  | 220 (15.3)         | 17 (22.1)      | 192 (15.1)                | 11 (12.6)                     |                |
|                             | 2017                                  | 184 (12.8)         | 34 (44.2)      | 135 (10.6)                | 15 (17.2)                     |                |
| Age (%)                     | >80                                   | 225 (15.6)         | 5 (6.5)        | 201 (15.8)                | 19 (21.8)                     | 0.113          |
|                             | ≤65                                   | 597 (41.5)         | 36 (46.8)      | 528 (41.4)                | 33 (37.9)                     |                |
|                             | 65-80                                 | 616 (42.8)         | 36 (46.8)      | 545 (42.8)                | 35 (40.2)                     |                |
| Gender (%)                  | Female                                | 350 (24.3)         | 18 (23.4)      | 309 (24.3)                | 23 (26.4)                     | 0.882          |
|                             | Male                                  | 1088 (75.7)        | 59 (76.6)      | 965 (75.7)                | 64 (73.6)                     |                |
| Race (%)                    | Black                                 | 137 (9.5)          | 10 (13.0)      | 109 (8.6)                 | 18 (20.7)                     | 0.002          |
|                             | Other                                 | 81 (5.6)           | 7 (9.1)        | 69 (5.4)                  | 5 (5.7)                       |                |
|                             | White                                 | 1220 (84.8)        | 60 (77.9)      | 1096 (86.0)               | 64 (73.6)                     |                |
| Marital.status (%)          | Married                               | 715 (49.7)         | 52 (67.5)      | 629 (49.4)                | 34 (39.1)                     | 0.001          |
|                             | Unmarried                             | 723 (50.3)         | 25 (32.5)      | 645 (50.6)                | 53 (60.9)                     |                |
| Histologic.type (%)         | Other type                            | 290 (20.2)         | 13 (16.9)      | 250 (19.6)                | 27 (31.0)                     | 0.001          |
|                             | Papillary transitional cell carcinoma | 298 (20.7)         | 28 (36.4)      | 257 (20.2)                | 13 (14.9)                     |                |
|                             | Transitional cell carcinoma?          | 850 (59.1)         | 36 (46.8)      | 767 (60.2)                | 47 (54.0)                     |                |
| Grade (%)                   | I                                     | 15 (1.0)           | 0 (0.0)        | 12 (0.9)                  | 3 (3.4)                       | 0.007          |
|                             | II                                    | 74 (5.1)           | 8 (10.4)       | 61 (4.8)                  | 5 (5.7)                       |                |
|                             | III                                   | 438 (30.5)         | 12 (15.6)      | 398 (31.2)                | 28 (32.2)                     |                |
|                             | IV                                    | 911 (63.4)         | 57 (74.0)      | 803 (63.0)                | 51 (58.6)                     |                |
| T.stage (%)                 | T0                                    | 18 (1.3)           | 1 (1.3)        | 15 (1.2)                  | 2 (2.3)                       | 0.024          |
|                             | T1                                    | 223 (15.5)         | 18 (23.4)      | 192 (15.1)                | 13 (14.9)                     |                |
|                             | T2                                    | 541 (37.6)         | 37 (48.1)      | 475 (37.3)                | 29 (33.3)                     |                |
|                             | T3                                    | 112 (7.8)          | 8 (10.4)       | 99 (7.8)                  | 5 (5.7)                       |                |
|                             | T4                                    | 251 (17.5)         | 9 (11.7)       | 228 (17.9)                | 14 (16.1)                     |                |
|                             | TX                                    | 293 (20.4)         | 4 (5.2)        | 265 (20.8)                | 24 (27.6)                     |                |
| N.stage (%)                 | N0                                    | 749 (52.1)         | 43 (55.8)      | 661 (51.9)                | 45 (51.7)                     | 0.215          |
|                             | N1                                    | 136 (9.5)          | 10 (13.0)      | 117 (9.2)                 | 9 (10.3)                      |                |
|                             | N2                                    | 243 (16.9)         | 9 (11.7)       | 225 (17.7)                | 9 (10.3)                      |                |

|                           |                              |     |             |            |             |           |        |
|---------------------------|------------------------------|-----|-------------|------------|-------------|-----------|--------|
|                           |                              | N3  | 95 (6.6)    | 8 (10.4)   | 81 (6.4)    | 6 (6.9)   |        |
|                           |                              | NX  | 215 (15.0)  | 7 (9.1)    | 190 (14.9)  | 18 (20.7) |        |
| Brain.metastasis (%)      |                              | No  | 1390 (96.7) | 77 (100.0) | 1230 (96.5) | 83 (95.4) | 0.208  |
|                           |                              | Yes | 48 (3.3)    | 0 (0.0)    | 44 (3.5)    | 4 (4.6)   |        |
| Liver.metastasis (%)      |                              | No  | 1090 (75.8) | 70 (90.9)  | 955 (75.0)  | 65 (74.7) | 0.006  |
|                           |                              | Yes | 348 (24.2)  | 7 (9.1)    | 319 (25.0)  | 22 (25.3) |        |
| Lung.metastasis (%)       |                              | No  | 1033 (71.8) | 66 (85.7)  | 903 (70.9)  | 64 (73.6) | 0.018  |
|                           |                              | Yes | 405 (28.2)  | 11 (14.3)  | 371 (29.1)  | 23 (26.4) |        |
| Surg.Prim.Site (%)        | Complete cystec-<br>tomy     |     | 58 (4.0)    | 6 (7.8)    | 51 (4.0)    | 1 (1.1)   | 0.003  |
|                           | Non-complete cys-<br>tectomy |     | 984 (68.4)  | 63 (81.8)  | 864 (67.8)  | 57 (65.5) |        |
|                           | None                         |     | 396 (27.5)  | 8 (10.4)   | 359 (28.2)  | 29 (33.3) |        |
| Surgery.of.lymph.node (%) |                              | No  | 1361 (94.6) | 65 (84.4)  | 1210 (95.0) | 86 (98.9) | <0.001 |
|                           |                              | Yes | 77 (5.4)    | 12 (15.6)  | 64 (5.0)    | 1 (1.1)   |        |
| Radiotherapy (%)          | None/Unknown                 |     | 973 (67.7)  | 54 (70.1)  | 855 (67.1)  | 64 (73.6) | 0.412  |
|                           | Yes                          |     | 465 (32.3)  | 23 (29.9)  | 419 (32.9)  | 23 (26.4) |        |
| Chemotherapy (%)          | No/Unknown                   |     | 756 (52.6)  | 21 (27.3)  | 673 (52.8)  | 62 (71.3) | <0.001 |
|                           | Yes                          |     | 682 (47.4)  | 56 (72.7)  | 601 (47.2)  | 25 (28.7) |        |

---

**Supplementary Table S2. Characteristics of patients before and after imputation in whole dataset.**

| Characteristics             | Level                                 | Before imputation (N = 1438) | After imputation (N = 1438) | <i>p</i> value |
|-----------------------------|---------------------------------------|------------------------------|-----------------------------|----------------|
| Survival.months (mean (SD)) |                                       | 7.89 (10.85)                 | 7.89 (10.85)                | 1              |
| OS (%)                      | Alive                                 | 77 (5.4)                     | 77 (5.4)                    | 1              |
|                             | Dead                                  | 1361 (94.6)                  | 1361 (94.6)                 |                |
| CSS (%)                     | Alive                                 | 77 (5.4)                     | 77 (5.4)                    | 1              |
|                             | Dead of cancer                        | 1274 (88.6)                  | 1274 (88.6)                 |                |
|                             | Dead of other causes                  | 87 (6.1)                     | 87 (6.1)                    |                |
| Year.of.diagnosis (%)       | 2010                                  | 159 (11.1)                   | 159 (11.1)                  | 1              |
|                             | 2011                                  | 149 (10.4)                   | 149 (10.4)                  |                |
|                             | 2012                                  | 192 (13.4)                   | 192 (13.4)                  |                |
|                             | 2013                                  | 162 (11.3)                   | 162 (11.3)                  |                |
|                             | 2014                                  | 174 (12.1)                   | 174 (12.1)                  |                |
|                             | 2015                                  | 198 (13.8)                   | 198 (13.8)                  |                |
|                             | 2016                                  | 220 (15.3)                   | 220 (15.3)                  |                |
|                             | 2017                                  | 184 (12.8)                   | 184 (12.8)                  |                |
| Age (%)                     | >80                                   | 225 (15.6)                   | 225 (15.6)                  | 1              |
|                             | ≤65                                   | 597 (41.5)                   | 597 (41.5)                  |                |
|                             | 65-80                                 | 616 (42.8)                   | 616 (42.8)                  |                |
| Gender (%)                  | Female                                | 350 (24.3)                   | 350 (24.3)                  | 1              |
|                             | Male                                  | 1088 (75.7)                  | 1088 (75.7)                 |                |
| Race (%)                    | Black                                 | 137 (9.5)                    | 137 (9.5)                   | 1              |
|                             | Other                                 | 81 (5.6)                     | 81 (5.6)                    |                |
|                             | White                                 | 1219 (84.8)                  | 1220 (84.8)                 |                |
| Marital.status (%)          | Married                               | 681 (49.8)                   | 715 (49.7)                  | 1              |
|                             | Unmarried                             | 687 (50.2)                   | 723 (50.3)                  |                |
| Histologic.type (%)         | Other type                            | 290 (20.2)                   | 290 (20.2)                  | 1              |
|                             | Papillary transitional cell carcinoma | 298 (20.7)                   | 298 (20.7)                  |                |
|                             | Transitional cell carcinoma?          | 850 (59.1)                   | 850 (59.1)                  |                |
| Grade (%)                   | I                                     | 9 (0.8)                      | 15 (1.0)                    | 0.028          |
|                             | II                                    | 48 (4.5)                     | 74 (5.1)                    |                |
|                             | III                                   | 271 (25.5)                   | 438 (30.5)                  |                |
|                             | IV                                    | 734 (69.1)                   | 911 (63.4)                  |                |
| T.stage (%)                 | T0                                    | 18 (1.3)                     | 18 (1.3)                    | 1              |
|                             | T1                                    | 221 (15.5)                   | 223 (15.5)                  |                |
|                             | T2                                    | 538 (37.6)                   | 541 (37.6)                  |                |
|                             | T3                                    | 112 (7.8)                    | 112 (7.8)                   |                |
|                             | T4                                    | 250 (17.5)                   | 251 (17.5)                  |                |
|                             | TX                                    | 290 (20.3)                   | 293 (20.4)                  |                |
| N.stage (%)                 | N0                                    | 747 (52.3)                   | 749 (52.1)                  | 1              |
|                             | N1                                    | 134 (9.4)                    | 136 (9.5)                   |                |
|                             | N2                                    | 241 (16.9)                   | 243 (16.9)                  |                |

|                           |                  |            |             |             |      |
|---------------------------|------------------|------------|-------------|-------------|------|
|                           |                  | N3         | 95 (6.6)    | 95 (6.6)    |      |
|                           |                  | NX         | 212 (14.8)  | 215 (15.0)  |      |
| Brain.metastasis (%)      |                  | No         | 1351 (96.6) | 1390 (96.7) | 1    |
|                           |                  | Yes        | 47 (3.4)    | 48 (3.3)    |      |
| Liver.metastasis (%)      |                  | No         | 1073 (76.0) | 1090 (75.8) | 0.94 |
|                           |                  | Yes        | 339 (24.0)  | 348 (24.2)  |      |
| Lung.metastasis (%)       |                  | No         | 1003 (71.8) | 1033 (71.8) | 1    |
|                           |                  | Yes        | 394 (28.2)  | 405 (28.2)  |      |
| Surg.Prim.Site (%)        | Complete cystec- | tomy       | 58 (4.0)    | 58 (4.0)    | 1    |
|                           | Non-complete     | cystectomy | 983 (68.5)  | 984 (68.4)  |      |
|                           | None             |            | 395 (27.5)  | 396 (27.5)  |      |
| Surgery.of.lymph.node (%) |                  | No         | 1356 (94.6) | 1361 (94.6) | 1    |
|                           |                  | Yes        | 77 (5.4)    | 77 (5.4)    |      |
| Radiotherapy (%)          | None/Unknown     |            | 973 (67.7)  | 973 (67.7)  | 1    |
|                           | Yes              |            | 465 (32.3)  | 465 (32.3)  |      |
| Chemotherapy (%)          | No/Unknown       |            | 756 (52.6)  | 756 (52.6)  | 1    |
|                           | Yes              |            | 682 (47.4)  | 682 (47.4)  |      |

---

**Supplementary Table S3. Univariable cox proportion hazards regression analyses for overall survival (OS) and cancer-specific survival (CSS) in training dataset.**

| Variables                                            | Overall survival (OS) |                | Cancer-specific survival (CSS) |                |
|------------------------------------------------------|-----------------------|----------------|--------------------------------|----------------|
|                                                      | HR (95%CI)            | <i>p</i> value | HR (95%CI)                     | <i>p</i> value |
| Age ≤ 65                                             | 0.68 (0.56-0.83)      | <0.001         | 0.72 (0.58-0.88)               | 0.002          |
| Age65-80                                             | 0.77 (0.63-0.93)      | 0.008          | 0.8 (0.66-0.99)                | 0.037          |
| GenderMale                                           | 0.87 (0.75-1.02)      | 0.087          | 0.86 (0.73-1.01)               | 0.065          |
| RaceBlack                                            | 1.11 (0.76-1.61)      | 0.601          | 0.94 (0.64-1.39)               | 0.77           |
| RaceWhite                                            | 1.12 (0.82-1.53)      | 0.466          | 1.09 (0.8-1.5)                 | 0.58           |
| Marital.statusUnmarried                              | 1.38 (1.2-1.58)       | <0.001         | 1.35 (1.18-1.56)               | <0.001         |
| Histologic.typePapillary transitional cell carcinoma | 0.9 (0.73-1.11)       | 0.338          | 0.92 (0.74-1.14)               | 0.45           |
| Histologic.typeTransitional cell carcinoma?          | 1.05 (0.88-1.24)      | 0.612          | 1.07 (0.9-1.28)                | 0.448          |
| Grade II                                             | 0.89 (0.41-1.93)      | 0.763          | 0.98 (0.43-2.23)               | 0.965          |
| GradeIII                                             | 1.13 (0.55-2.3)       | 0.737          | 1.16 (0.54-2.47)               | 0.709          |
| GradeIV                                              | 0.9 (0.45-1.83)       | 0.781          | 0.95 (0.45-2.02)               | 0.891          |
| T.stageT1                                            | 0.84 (0.48-1.46)      | 0.53           | 0.93 (0.51-1.69)               | 0.82           |
| T.stageT2                                            | 0.78 (0.46-1.34)      | 0.368          | 0.86 (0.48-1.53)               | 0.6            |
| T.stageT3                                            | 0.7 (0.39-1.24)       | 0.222          | 0.78 (0.42-1.45)               | 0.441          |
| T.stageT4                                            | 0.92 (0.53-1.6)       | 0.772          | 1.02 (0.57-1.85)               | 0.942          |
| T.stageTX                                            | 1.18 (0.68-2.05)      | 0.545          | 1.28 (0.71-2.3)                | 0.42           |
| N.stageN1                                            | 0.92 (0.71-1.17)      | 0.487          | 0.91 (0.7-1.17)                | 0.459          |
| N.stageN2                                            | 1.05 (0.87-1.27)      | 0.589          | 1.09 (0.9-1.32)                | 0.364          |
| N.stageN3                                            | 1 (0.75-1.33)         | 0.975          | 1.04 (0.78-1.39)               | 0.791          |
| N.stageNX                                            | 1.06 (0.87-1.29)      | 0.565          | 1.01 (0.82-1.24)               | 0.95           |
| Brain.metastasisYes                                  | 1.84 (1.27-2.66)      | 0.001          | 1.86 (1.28-2.72)               | 0.001          |
| Liver.metastasisYes                                  | 1.7 (1.44-1.99)       | <0.001         | 1.73 (1.47-2.04)               | <0.001         |
| Lung.metastasisYes                                   | 1.37 (1.18-1.59)      | <0.001         | 1.4 (1.2-1.63)                 | <0.001         |
| Surg.Prim.SiteComplete cystectomy                    | 0.41 (0.28-0.59)      | <0.001         | 0.42 (0.29-0.62)               | <0.001         |
| Surg.Prim.SiteNon-complete cystectomy                | 0.65 (0.56-0.76)      | <0.001         | 0.65 (0.56-0.76)               | <0.001         |
| Surgery.of.lymph.nodeYes                             | 0.54 (0.4-0.74)       | <0.001         | 0.57 (0.41-0.78)               | 0.001          |
| RadiotherapyYes                                      | 0.99 (0.86-1.14)      | 0.92           | 1.01 (0.87-1.17)               | 0.903          |
| ChemotherapyYes                                      | 0.34 (0.29-0.39)      | <0.001         | 0.36 (0.31-0.41)               | <0.001         |

**Supplementary Table S4. Final selected variables for overall survival (OS) and cancer-specific survival (CSS) in stepwise, backward, multivariable cox proportion hazards regression analyses.**

| Variables               | Overall survival (OS) |                  |                | Cancer-specific survival (CSS) |                  |                |
|-------------------------|-----------------------|------------------|----------------|--------------------------------|------------------|----------------|
|                         | $\beta$ - coefficient | HR (95%CI)       | <i>p</i> value | $\beta$ - coefficient          | HR (95%CI)       | <i>p</i> value |
| Marital.status          |                       |                  |                |                                |                  |                |
| Married                 | Reference             |                  |                | Reference                      |                  |                |
| Unmarried               | 0.199                 | 1.22 (1.06-1.4)  | 0.0049         | 0.192                          | 1.21 (1.05-1.4)  | 0.0082         |
| Brain.metastasis        |                       |                  |                |                                |                  |                |
| No                      | Reference             |                  |                | Reference                      |                  |                |
| Yes                     | 0.431                 | 1.54 (1.06-2.24) | 0.0249         | 0.444                          | 1.56 (1.06-2.29) | 0.0233         |
| Liver.metastasis        |                       |                  |                |                                |                  |                |
| No                      | Reference             |                  |                | Reference                      |                  |                |
| Yes                     | 0.489                 | 1.63 (1.37-1.94) | <0.001         | 0.499                          | 1.65 (1.38-1.96) | <0.001         |
| Lung.metastasis         |                       |                  |                |                                |                  |                |
| No                      | Reference             |                  |                | Reference                      |                  |                |
| Yes                     | 0.194                 | 1.21 (1.04-1.42) | 0.017          | 0.206                          | 1.23 (1.04-1.45) | 0.0132         |
| Surg.Prim.Site          |                       |                  |                |                                |                  |                |
| None                    | Reference             |                  |                | Reference                      |                  |                |
| Complete cystectomy     | -0.57                 | 0.57 (0.39-0.82) | 0.0025         | -0.537                         | 0.58 (0.4-0.85)  | 0.0051         |
| Non-complete cystectomy | -0.318                | 0.73 (0.62-0.85) | <0.001         | -0.311                         | 0.73 (0.62-0.86) | <0.001         |
| Chemotherapy            |                       |                  |                |                                |                  |                |
| No/Unknown              | Reference             |                  |                | Reference                      |                  |                |
| Yes                     | -1.064                | 0.35 (0.3-0.4)   | <0.001         | -1.014                         | 0.36 (0.31-0.42) | <0.001         |



**Supplementary Table S5. Score assignment for variables included in the nomograms of overall survival (OS) and cancer-specific survival (CSS).**

| Overall survival (OS) |                                        |       | Cancer-specific survival (CSS) |                                        |       |
|-----------------------|----------------------------------------|-------|--------------------------------|----------------------------------------|-------|
| Variables             | Category                               | Score | Variables                      | Category                               | Score |
| Marital status        | Married                                | 0     | Marital status                 | Married                                | 0     |
|                       | Unmarried                              | 19    |                                | Unmarried                              | 19    |
| Brain metastasis      | No                                     | 0     | Brain metastasis               | No                                     | 0     |
|                       | Yes                                    | 41    |                                | Yes                                    | 44    |
| Liver metastasis      | No                                     | 0     | Liver metastasis               | No                                     | 0     |
|                       | Yes                                    | 46    |                                | Yes                                    | 49    |
| Lung metastasis       | No                                     | 0     | Lung metastasis                | No                                     | 0     |
|                       | Yes                                    | 18    |                                | Yes                                    | 20    |
| Surg Prim Site        | Complete cystec-<br>tomy               | 0     | Surg Prim Site                 | Complete cystec-<br>tomy               | 0     |
|                       | Non-complete<br>cystectomy             | 24    |                                | Non-complete<br>cystectomy             | 22    |
|                       | None                                   | 54    |                                | None                                   | 53    |
| Chemotherapy          | No/Unknown                             | 100   | Chemotherapy                   | No/Unknown                             | 100   |
|                       | Yes                                    | 0     |                                | Yes                                    | 0     |
| 3-month Survival      |                                        |       | 3-month Survival               |                                        |       |
| Total scores          | 3-month Sur-<br>vival Probabil-<br>ity |       | Total scores                   | 3-month Sur-<br>vival Probabil-<br>ity |       |
|                       | 239                                    | 0.1   |                                | 252                                    | 0.1   |
|                       | 206                                    | 0.2   |                                | 216                                    | 0.2   |
|                       | 178                                    | 0.3   |                                | 188                                    | 0.3   |
|                       | 153                                    | 0.4   |                                | 161                                    | 0.4   |
|                       | 127                                    | 0.5   |                                | 133                                    | 0.5   |
|                       | 98                                     | 0.6   |                                | 103                                    | 0.6   |
|                       | 64                                     | 0.7   |                                | 68                                     | 0.7   |
|                       | 20                                     | 0.8   |                                | 22                                     | 0.8   |
| 6-month Survival      |                                        |       | 6-month Survival               |                                        |       |
| Total scores          | 6-month Sur-<br>vival Probabil-<br>ity |       | Total scores                   | 6-month Sur-<br>vival Probabil-<br>ity |       |
|                       | 182                                    | 0.1   |                                | 193                                    | 0.1   |
|                       | 149                                    | 0.2   |                                | 158                                    | 0.2   |
|                       | 121                                    | 0.3   |                                | 129                                    | 0.3   |
|                       | 96                                     | 0.4   |                                | 102                                    | 0.4   |
|                       | 70                                     | 0.5   |                                | 75                                     | 0.5   |
|                       | 41                                     | 0.6   |                                | 45                                     | 0.6   |
|                       | 7                                      | 0.7   |                                | 9                                      | 0.7   |
|                       |                                        |       |                                | -37                                    | 0.8   |
| 12-month Survival     |                                        |       | 12-month Survival              |                                        |       |

| Total scores | 12-month Survival Probability |     | Total scores | 12-month Survival Probability |     |
|--------------|-------------------------------|-----|--------------|-------------------------------|-----|
|              |                               |     |              |                               |     |
|              | 121                           | 0.1 |              | 128                           | 0.1 |
|              | 87                            | 0.2 |              | 93                            | 0.2 |
|              | 60                            | 0.3 |              | 64                            | 0.3 |
|              | 35                            | 0.4 |              | 37                            | 0.4 |
|              | 8                             | 0.5 |              | 10                            | 0.5 |
|              | -20                           | 0.6 |              | -20                           | 0.6 |

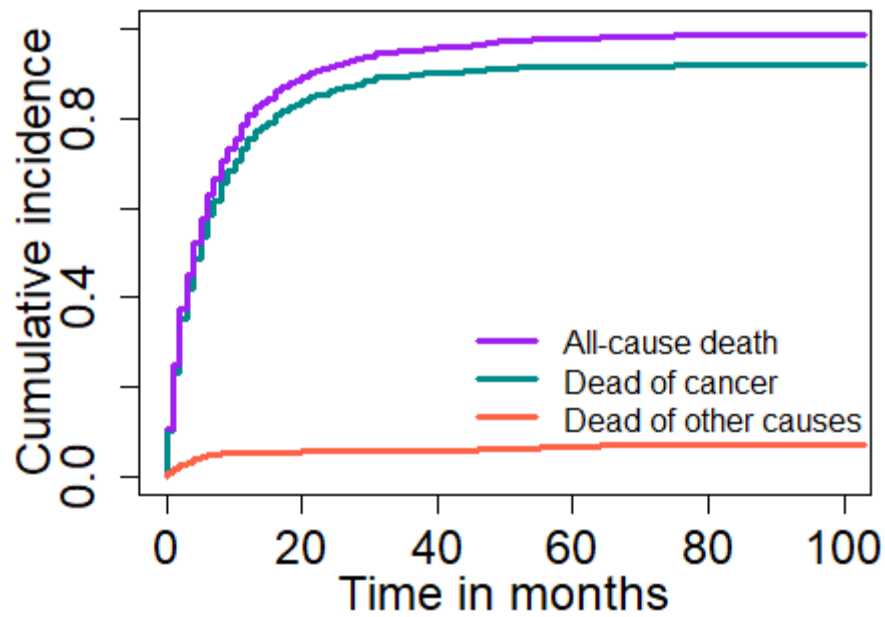

**Supplementary Figure S1. Cumulative incidences curves of cancer and noncancer death in whole dataset.**

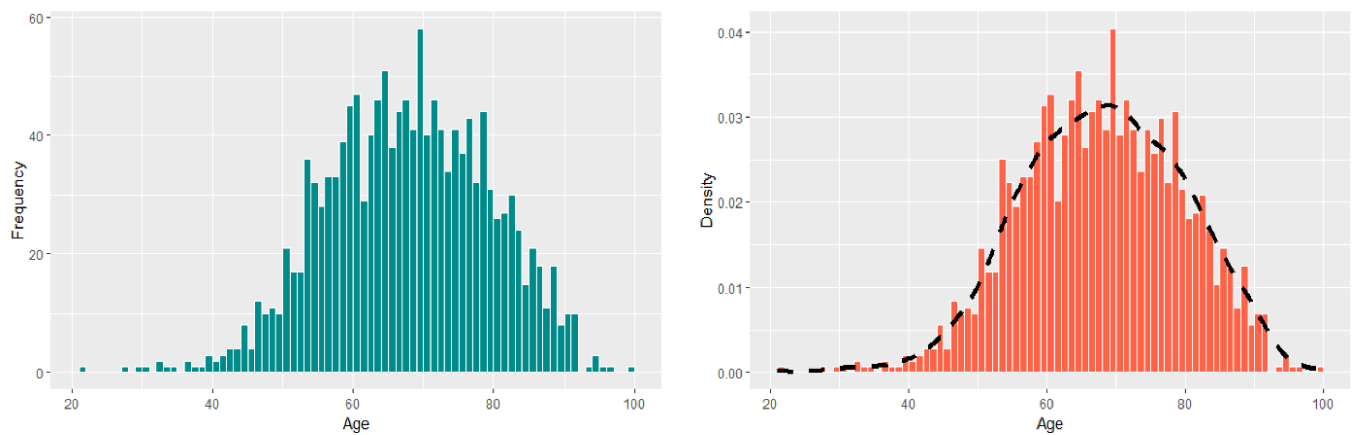

**Supplementary Figure S2. Frequency distribution histogram and density curve of age in whole dataset.**

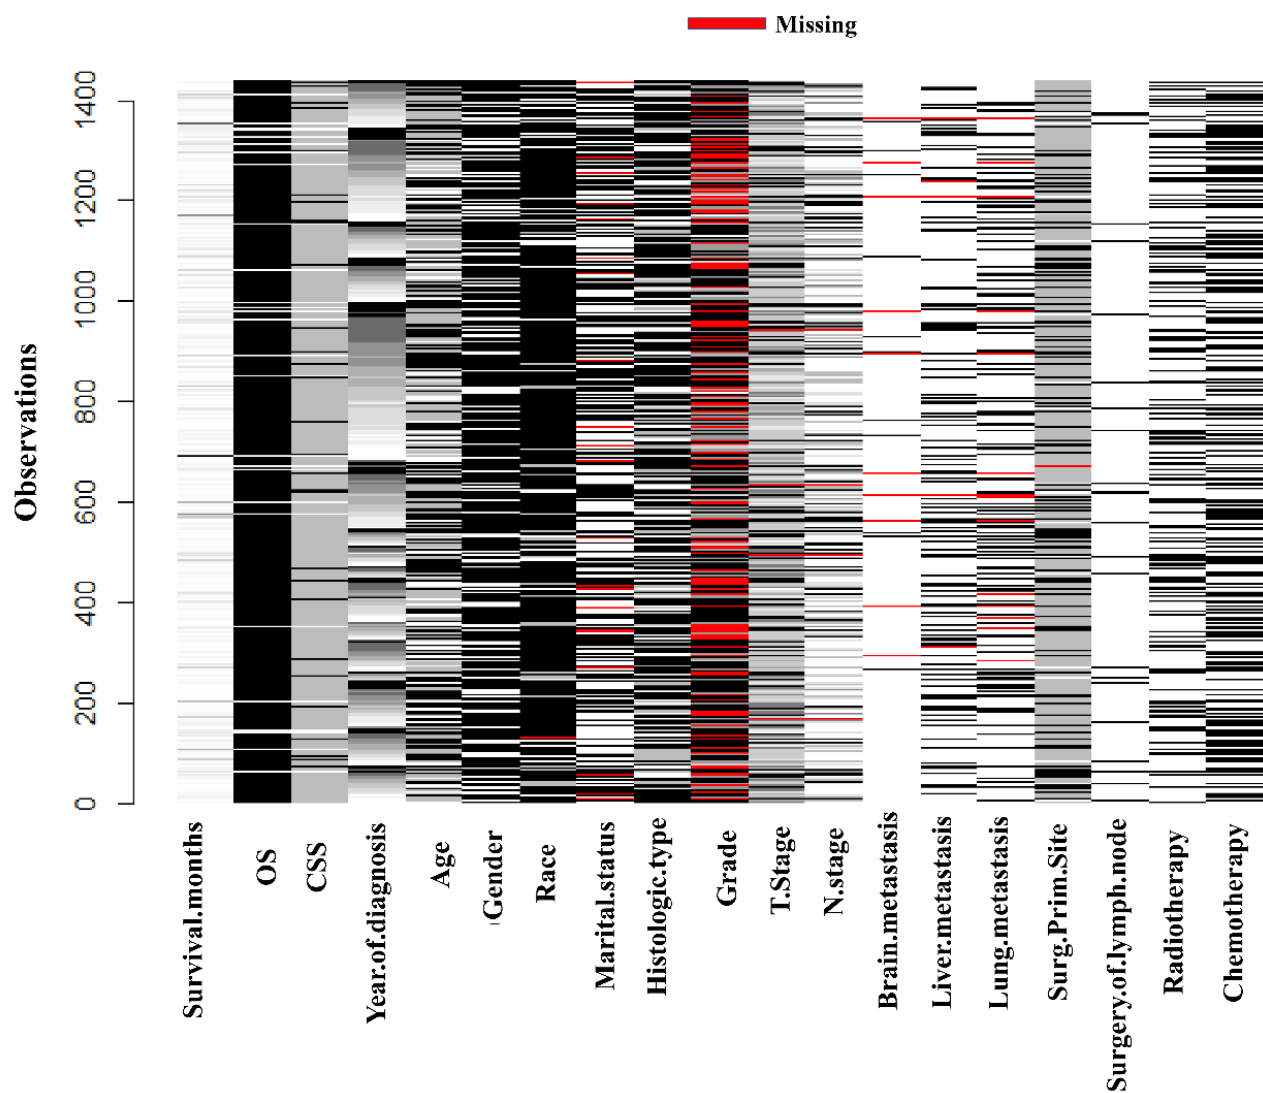

Supplementary Figure S3. Pattern of missing values in whole dataset before imputation.

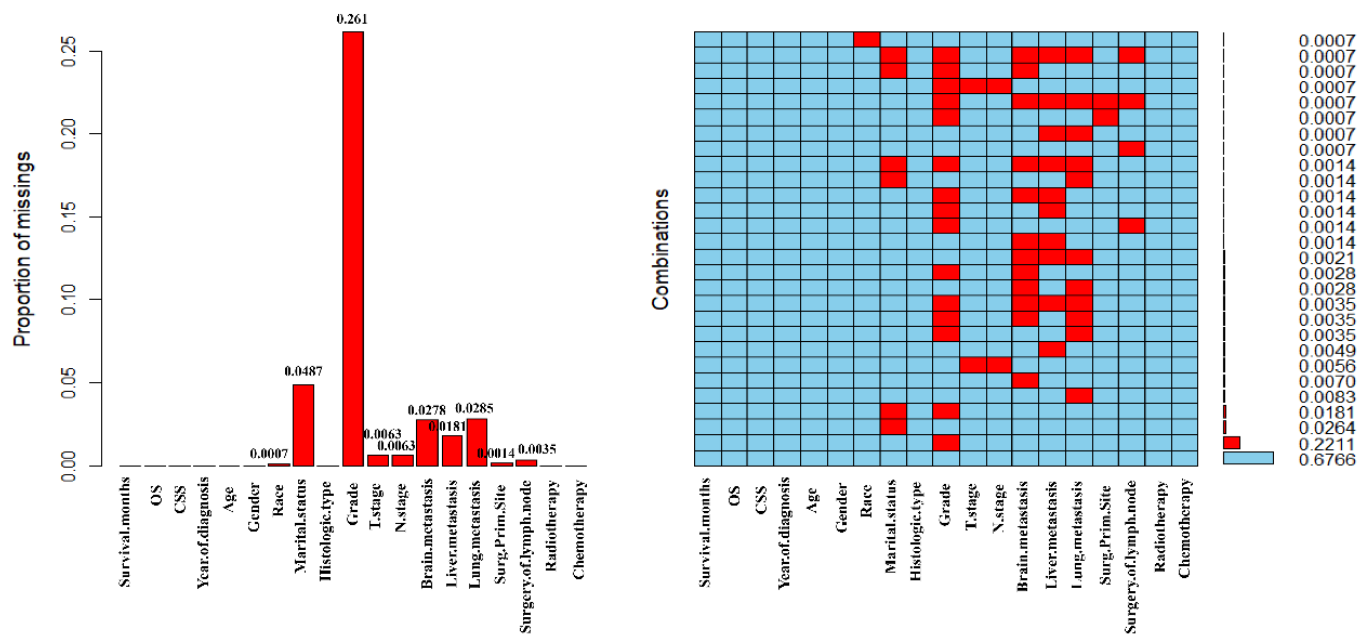

**Supplementary Figure S4. Proportion and combinations of missing values in whole dataset before imputation.**

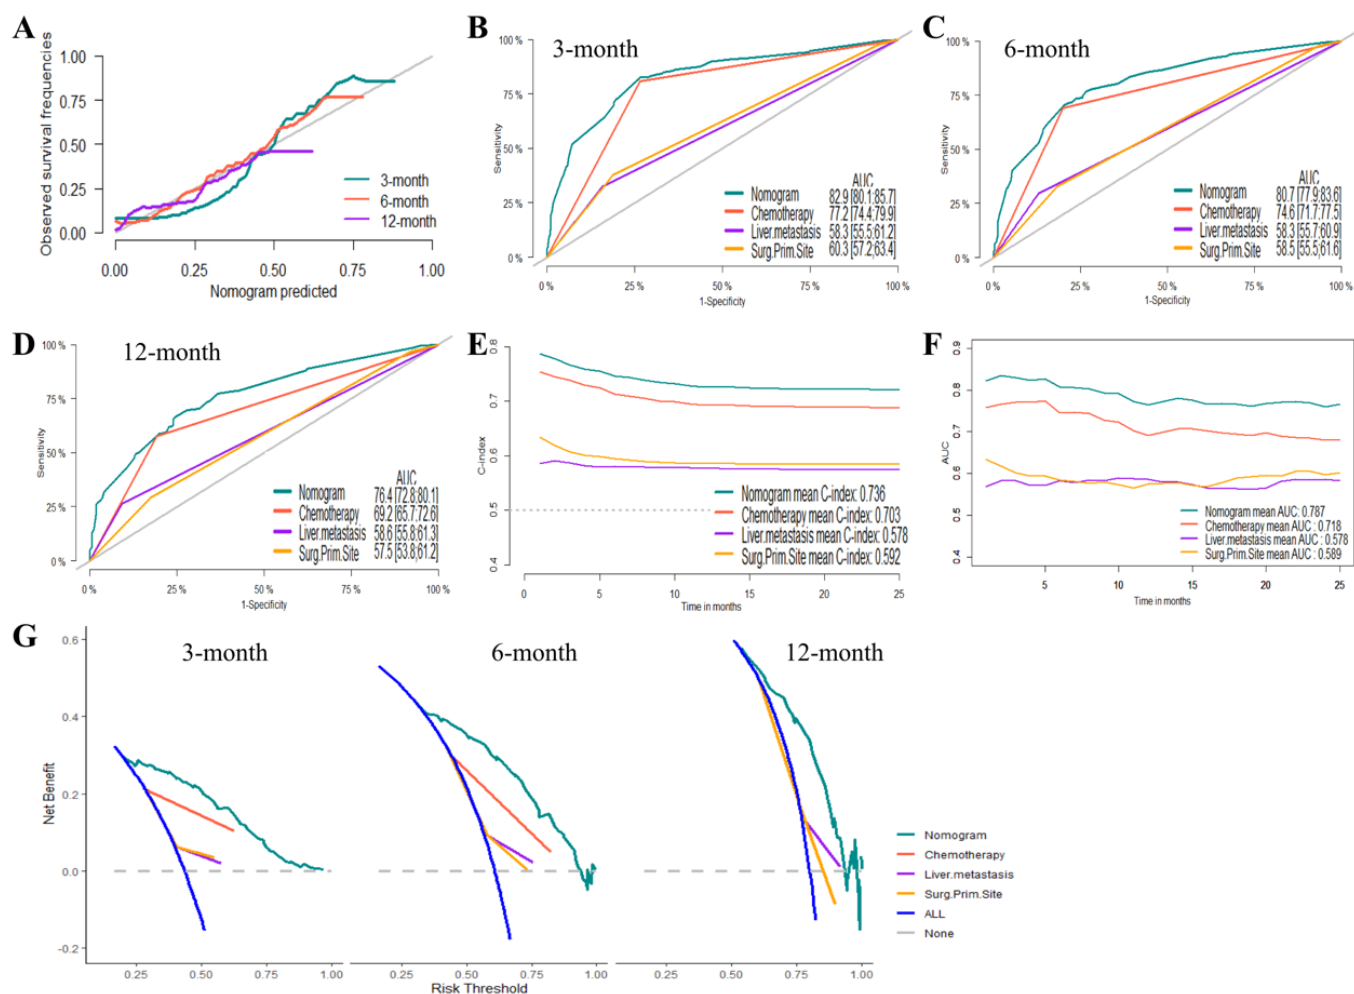

**Supplementary Figure S5. Evaluation of the nomogram on training dataset for overall survival (OS). (A) 3-, 6- and 12-month Calibration plots of Nomogram. (B) 3-month (C) 6-month and (D) 12-month Area Under the Curve (AUC) for Receiver Operating Characteristic (ROC) curves of Nomogram, Chemotherapy, Liver metastasis and Primary site surgery. (E) Overall Concordance Index (c-index) of Nomogram, Chemotherapy, Liver metastasis and Primary site surgery. (F) Overall AUC of Nomogram, Chemotherapy, Liver metastasis and Primary site surgery. (G) 3-, 6- and 12-month Decision Curve Analysis (DCA) of Nomogram, Chemotherapy, Liver metastasis and Primary site surgery.**

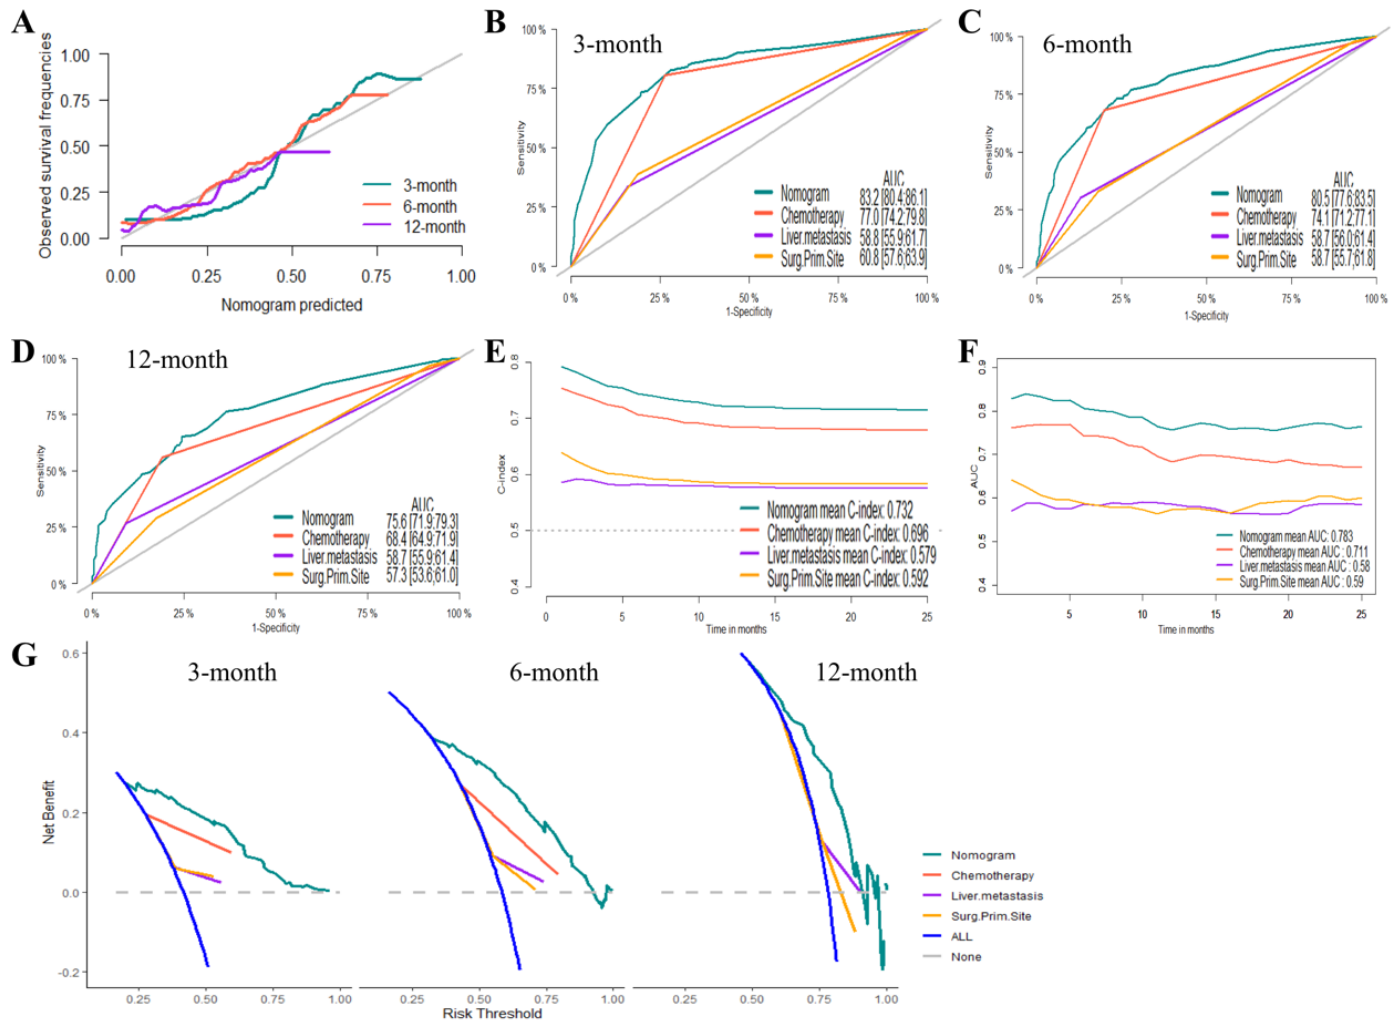

**Supplementary Figure S6. Evaluation of the nomogram on training dataset for cancer-specific survival (CSS). (A) 3-, 6- and 12-month Calibration plots of Nomogram. (B) 3-month (C) 6-month and (D) 12-month Area Under the Curve (AUC) for Receiver Operating Characteristic (ROC) curves of Nomogram, Chemotherapy, Liver metastasis and Primary site surgery. (E) Overall Concordance Index (c-index) of Nomogram, Chemotherapy, Liver metastasis and Primary site surgery. (F) Overall AUC of Nomogram, Chemotherapy, Liver metastasis and Primary site surgery. (G) 3-, 6- and 12-month Decision Curve Analysis (DCA) of Nomogram, Chemotherapy, Liver metastasis and Primary site surgery.**

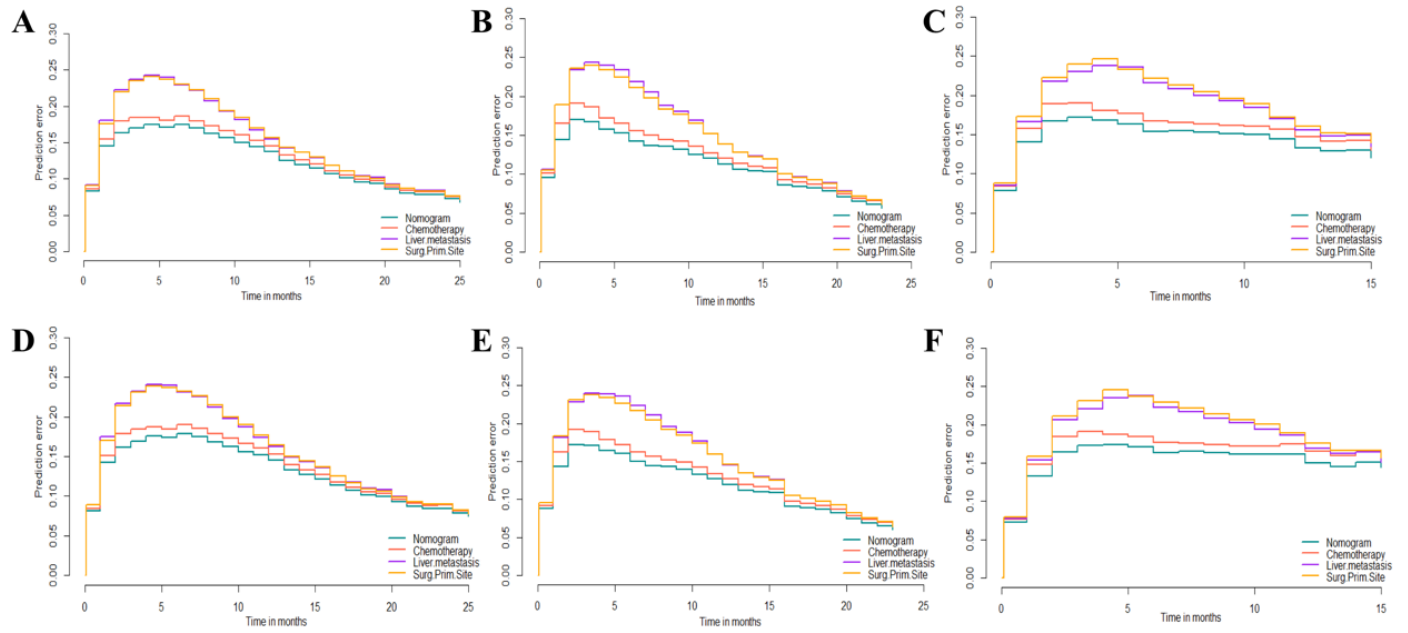

**Supplementary Figure S7. The prediction error curves for different models based on the integrated Brier score (IBS). (A) Training dataset of overall survival (OS). (B) Internal validation dataset of overall survival (OS). (C) External testing dataset of overall survival (OS). (D) Training dataset of cancer-specific survival (CSS). (E) Internal validation dataset of cancer-specific survival (CSS). (F) External testing dataset of cancer-specific survival (CSS).**



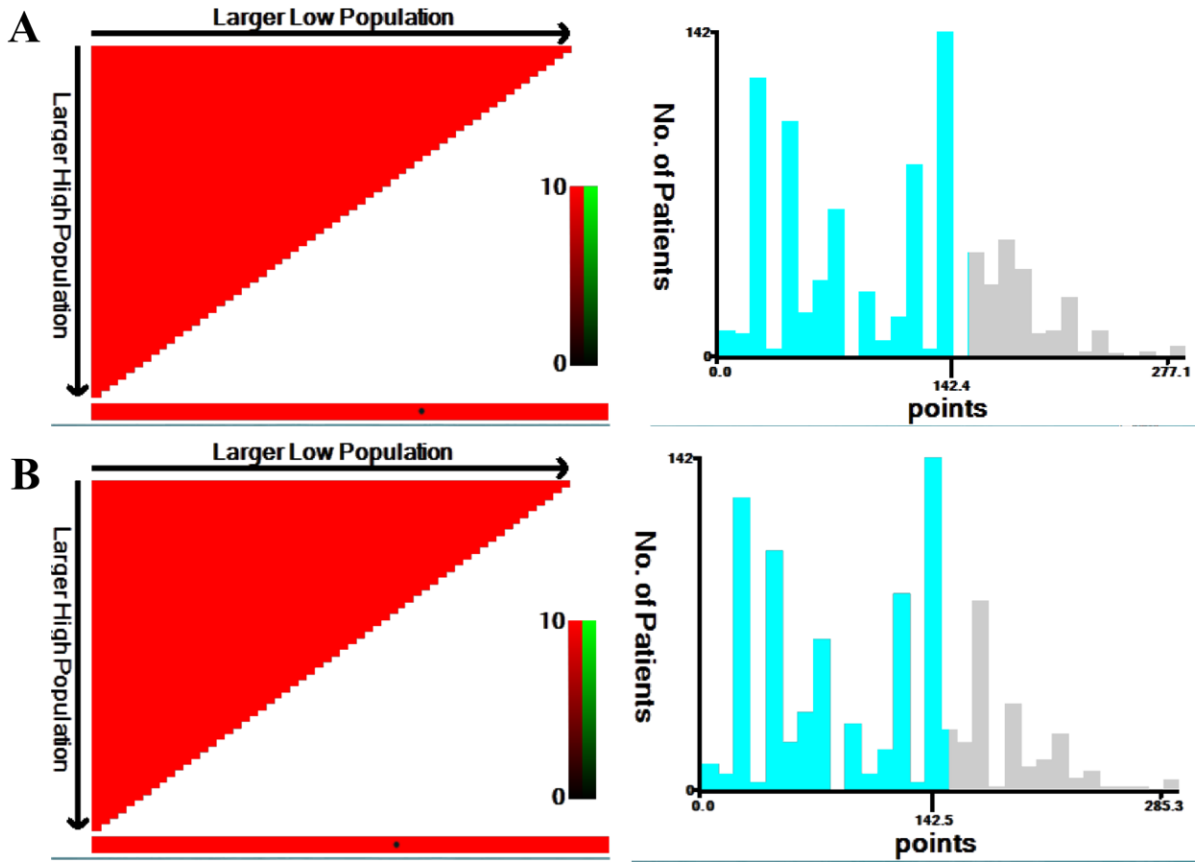

Supplementary Figure S8. Cut-off values of nomogram total points calculated by X-tile. (A) Training dataset of Overall survival (OS). (B) Training dataset of cancer-specific survival (CSS).

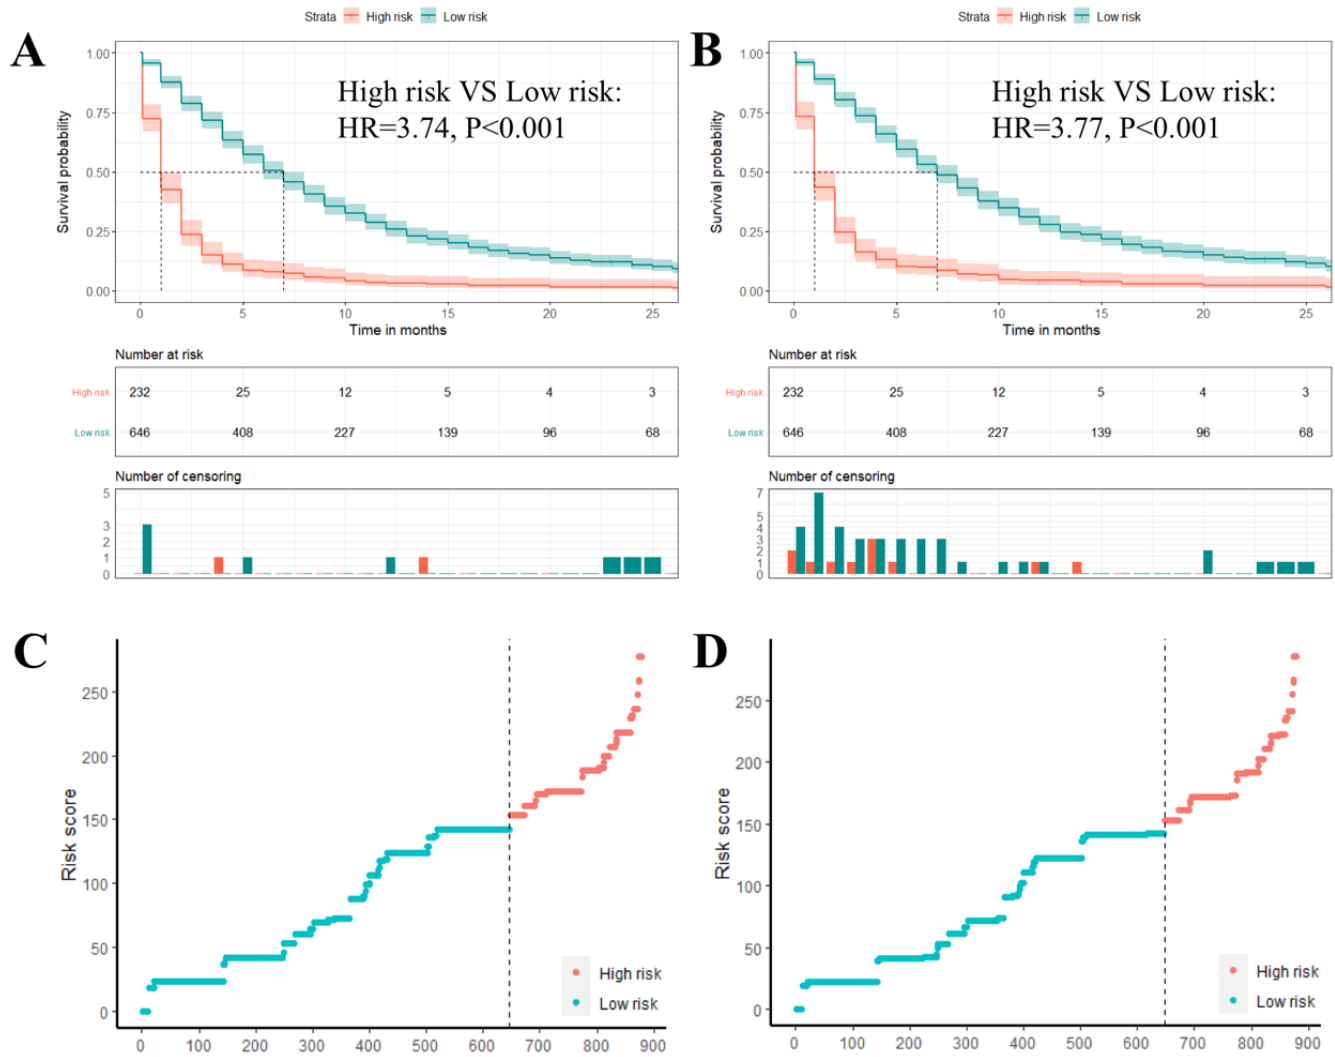

**Supplementary Figure S9. Kaplan-Meier survival curves of patients stratified by risk score and scatterplot of the risk score for (A, C) Training dataset of overall survival (OS). (B, D) Training dataset of cancer-specific survival (CSS).**

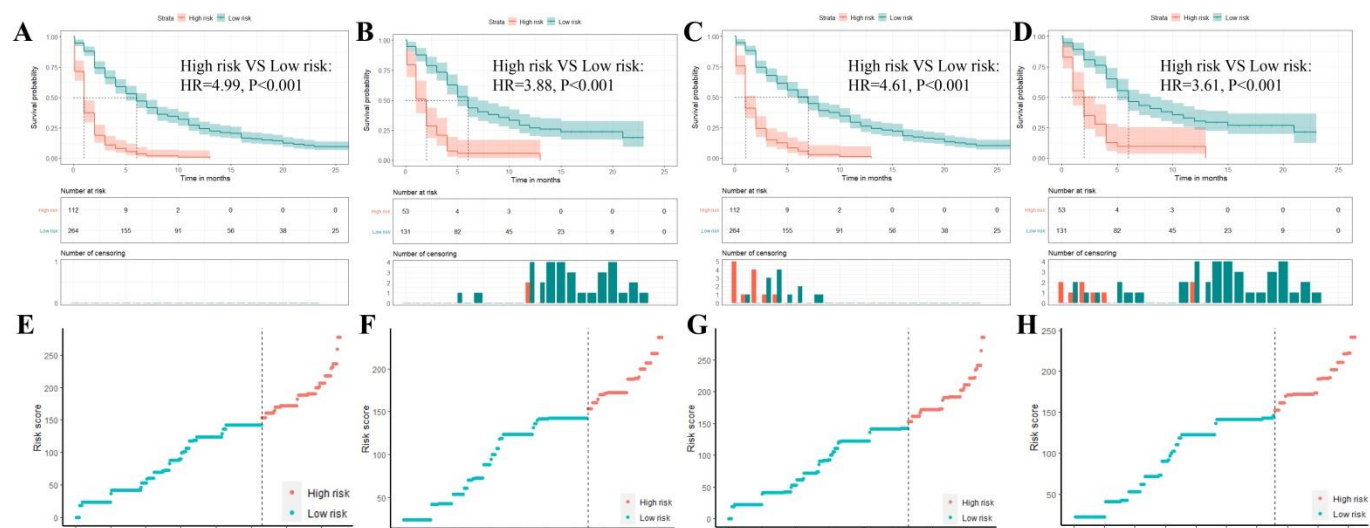

**Supplementary Figure S10. Kaplan-Meier survival curves of patients stratified by risk score and scatterplot of the risk score for (A, E) Internal validation of overall survival (OS). (B, F) External testing dataset of overall survival (OS). (C, G) Internal validation dataset of cancer-specific survival (CSS). (D, H) External testing dataset of cancer-specific survival (CSS).**

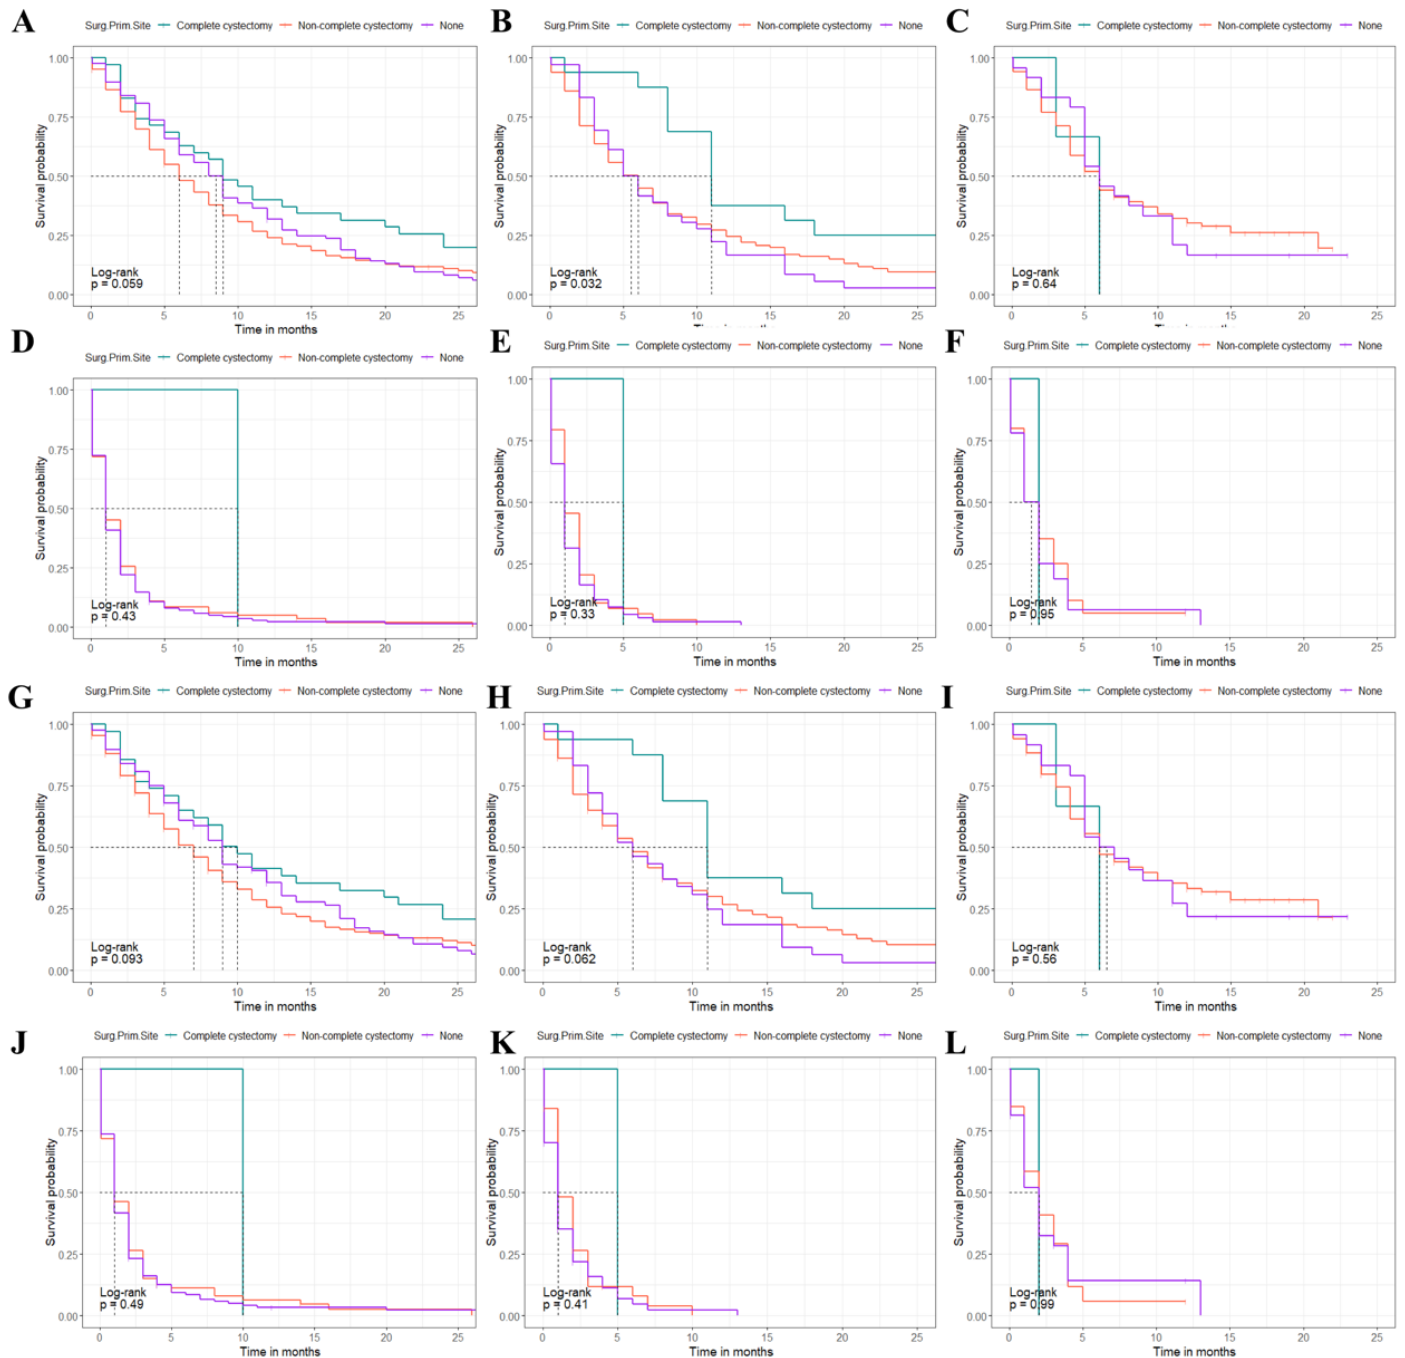

**Supplementary Figure S11. Kaplan–Meier curves of patients with different surgery in low- (A-C) and high-risk (D-F) group for Overall survival (OS) and low- (G-I) and high-risk (J-L) group for Cancer-specific survival (CSS).**

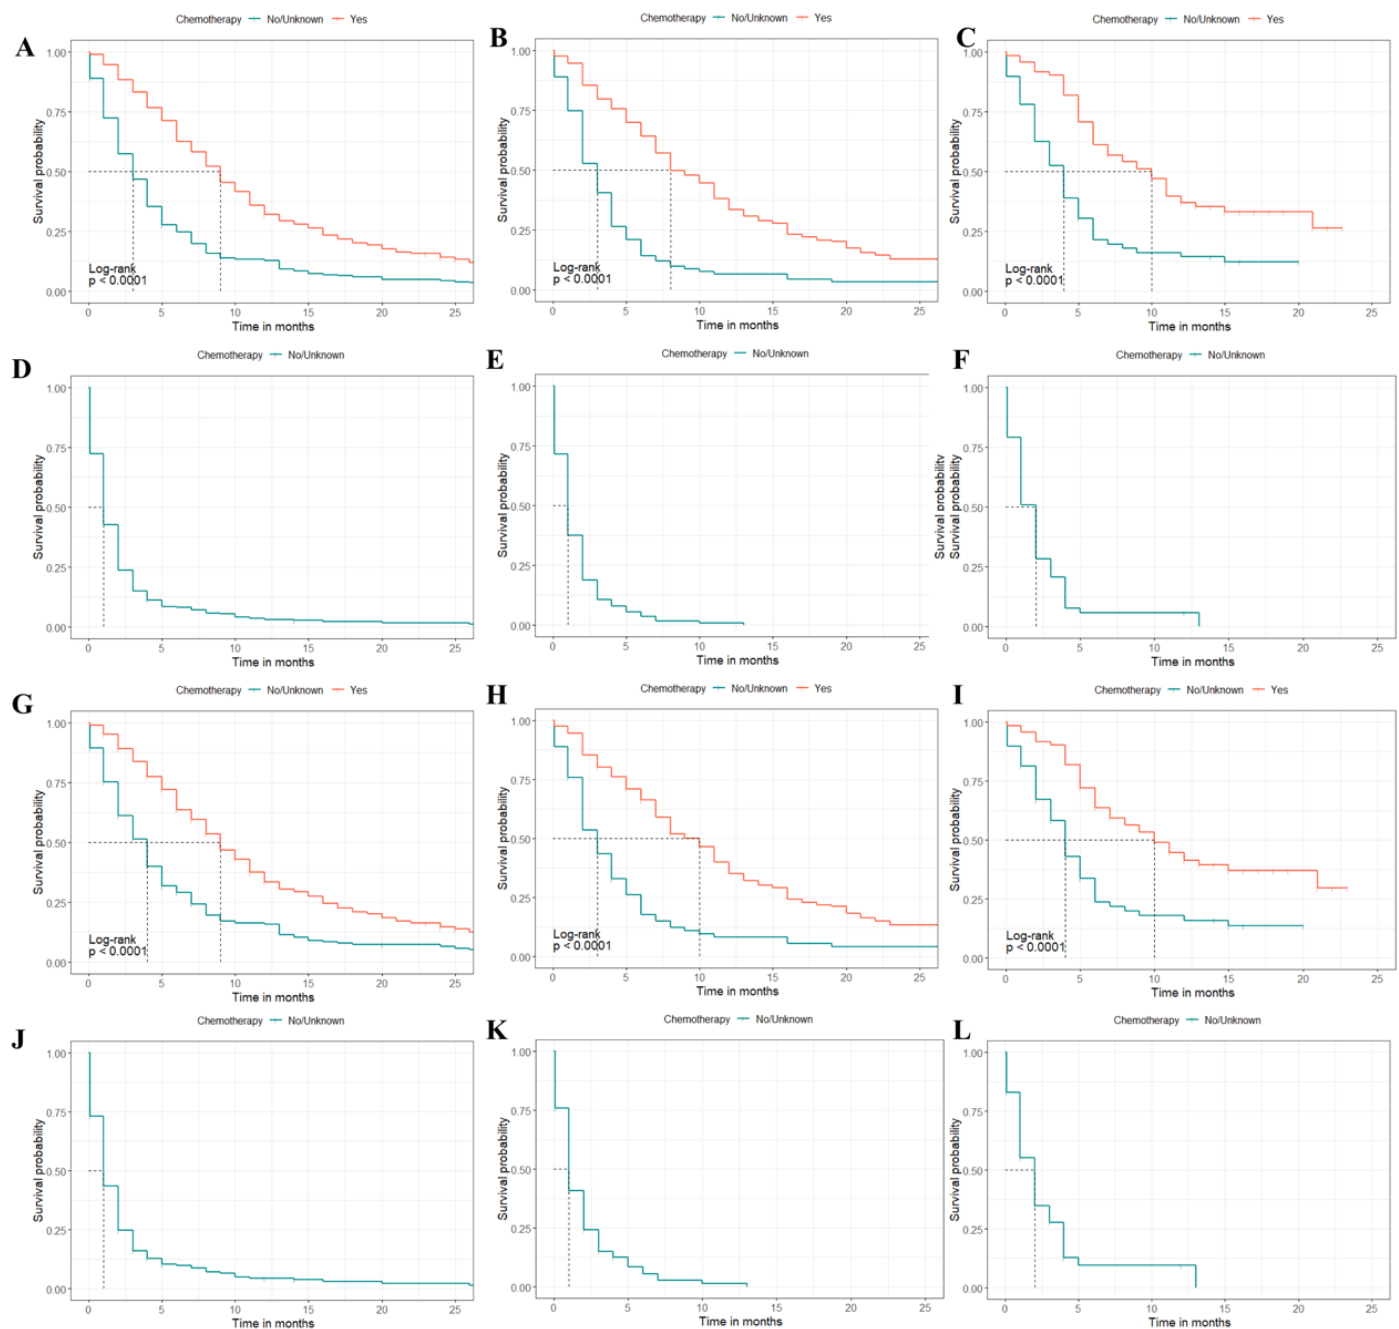

**Supplementary Figure S12. Kaplan–Meier curves of patients with different chemotherapy in low- (A-C) and high-risk (D-F) group for Overall survival (OS) and low- (G-I) and high-risk (J-L) group for Cancer-specific survival (CSS).**

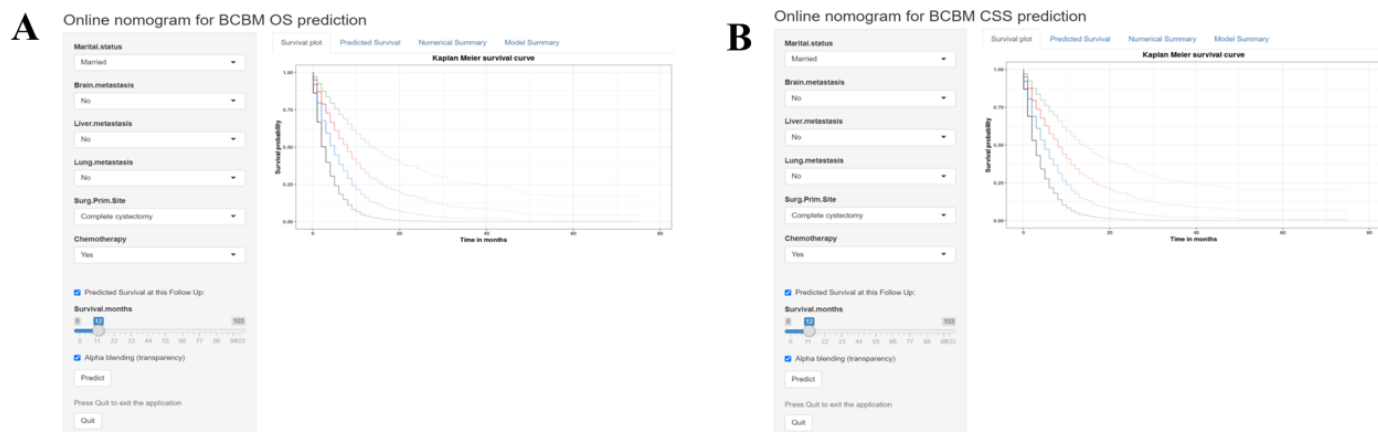

**Supplementary Figure S13.** The web survival rate calculator for (A) Overall survival (OS). (B) Cancer-specific survival (CSS).

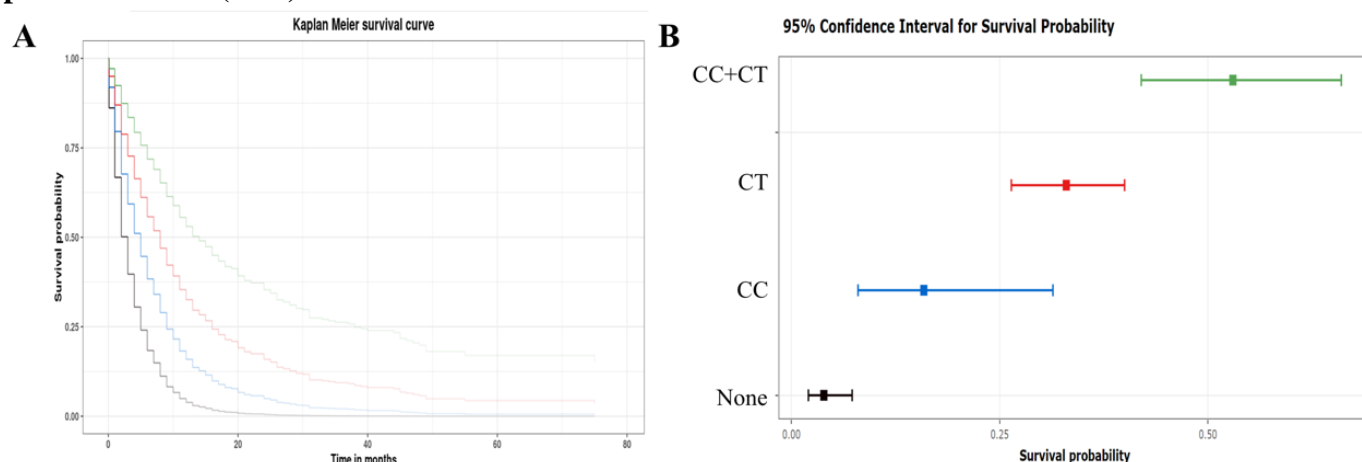

**Supplementary Figure S14.** The web survival rate calculator estimated overall survival (OS) of a hypothetical patient (Married; No brain metastasis, liver or lung metastasis) based on different treatment strategy. (A) Survival curves of different treatments. (B) 12-month survival probability with 95%CI of different treatments. Abbreviations: CC, complete cystectomy; CT, chemotherapy.

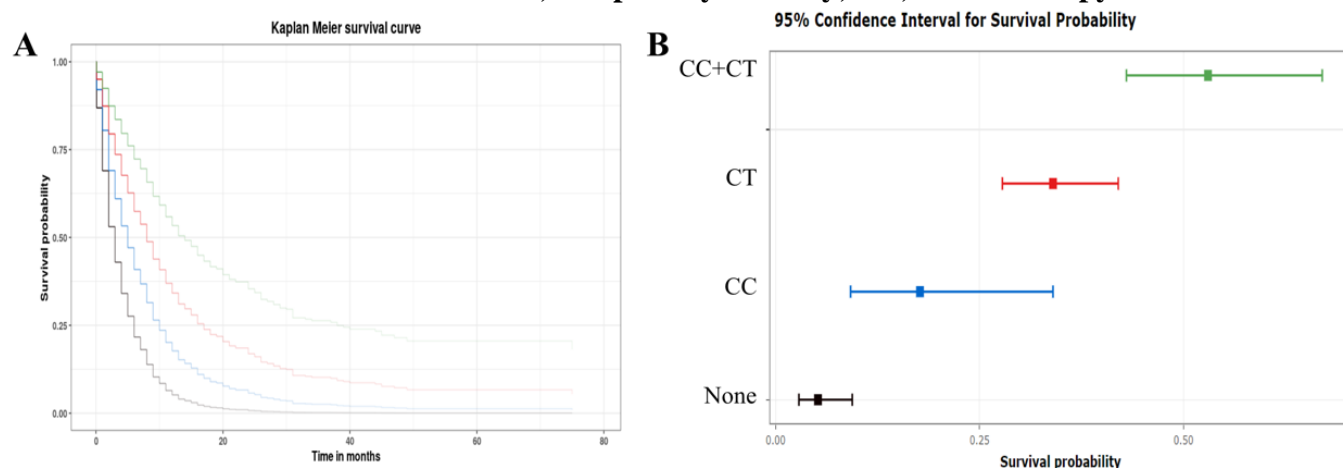

**Supplementary Figure S15.** The web survival rate calculator estimated cancer-specific survival (CSS) of a hypothetical patient (Married; No brain metastasis, liver or lung metastasis) based on different treatment strategy. (A) Survival curves of different treatments. (B) 12-month survival probability with 95%CI of different treatments. Abbreviations: CC, complete cystectomy; CT, chemotherapy.

## Supplementary material B

### STROBE Statement—Checklist of items that should be included in reports of *cohort studies*

|                           | Item No | Recommendation                                                                                                                                                                       | Section and paragraph #                                                                                          |
|---------------------------|---------|--------------------------------------------------------------------------------------------------------------------------------------------------------------------------------------|------------------------------------------------------------------------------------------------------------------|
| Title and abstract        | 1       | (a) Indicate the study’s design with a commonly used term in the title or the abstract                                                                                               | Page 1, Title                                                                                                    |
|                           |         | (b) Provide in the abstract an informative and balanced summary of what was done and what was found                                                                                  | Page 3, Abstract                                                                                                 |
| Introduction              |         |                                                                                                                                                                                      |                                                                                                                  |
| Background/rationale      | 2       | Explain the scientific background and rationale for the investigation being reported                                                                                                 | Page 5, Introduction, paragraph #1-#3                                                                            |
| Objectives                | 3       | State specific objectives, including any pre-specified hypotheses                                                                                                                    | Page 5, Introduction, paragraph #3                                                                               |
| Materials and methods     |         |                                                                                                                                                                                      |                                                                                                                  |
| Study design              | 4       | Present key elements of study design early in the paper                                                                                                                              | Page 6-8, Methods/Section “Sources of database”; Methods/ Section “Construction and validation of the nomograms” |
| Setting                   | 5       | Describe the setting, locations, and relevant dates, including periods of recruitment, exposure, follow-up, and data collection                                                      | Page 6, Methods/ Section “Inclusion and exclusion criteria”;                                                     |
| Participants              | 6       | (a) Give the eligibility criteria, and the sources and methods of selection of participants. Describe methods of follow-up                                                           | Page 6, Methods/Section “Sources of database”; Methods/ Section “Inclusion and exclusion criteria”               |
|                           |         | (b) For matched studies, give matching criteria and number of exposed and unexposed                                                                                                  | Not applicable                                                                                                   |
| Variables                 | 7       | Clearly define all outcomes, exposures, predictors, potential confounders, and effect modifiers. Give diagnostic criteria, if applicable                                             | Page 6, Methods/ Section “Inclusion and exclusion criteria”                                                      |
| Data sources/ measurement | 8*      | For each variable of interest, give sources of data and details of methods of assessment (measurement). Describe comparability of assessment methods if there is more than one group | Page 6, Methods/Section “Source of database”; Methods/ Section “Inclusion and exclusion criteria”                |
| Bias                      | 9       | Describe any efforts to address potential sources of bias                                                                                                                            | Page 6, 8, Methods/ Section “Inclusion and exclusion criteria”; Methods/ Section “Statistical analysis”          |
| Study size                | 10      | Explain how the study size was arrived at                                                                                                                                            | Page 6, Methods/ Section “Inclusion and exclusion criteria”                                                      |
| Quantitative variables    | 11      | Explain how quantitative variables were handled in the analyses. If applicable, describe which groupings were chosen and why                                                         | Page 8, Methods/ Section “Statistical analysis”                                                                  |
| Statistical methods       | 12      | (a) Describe all statistical methods, including those used to control for confounding                                                                                                | Page 8, Methods/ Section “Statistical analysis”                                                                  |
|                           |         | (b) Describe any methods used to examine subgroups and interactions                                                                                                                  | Page 7-8, Methods/ Section “Construction and validation of the                                                   |

|                   |     |                                                                                                                                                                                                              |                                                                                                                                                                                                                                                                                                  |
|-------------------|-----|--------------------------------------------------------------------------------------------------------------------------------------------------------------------------------------------------------------|--------------------------------------------------------------------------------------------------------------------------------------------------------------------------------------------------------------------------------------------------------------------------------------------------|
|                   |     |                                                                                                                                                                                                              | nomograms”; Methods/ Section “Statistical analysis”                                                                                                                                                                                                                                              |
|                   |     | (c) Explain how missing data were addressed                                                                                                                                                                  | Page 8, Methods/ Section “Statistical analysis”                                                                                                                                                                                                                                                  |
|                   |     | (d) If applicable, explain how loss to follow-up was addressed                                                                                                                                               | Not applicable                                                                                                                                                                                                                                                                                   |
|                   |     | (e) Describe any sensitivity analyses                                                                                                                                                                        | Not applicable                                                                                                                                                                                                                                                                                   |
| <b>Results</b>    |     |                                                                                                                                                                                                              |                                                                                                                                                                                                                                                                                                  |
| Participants      | 13* | (a) Report numbers of individuals at each stage of study—eg numbers potentially eligible, examined for eligibility, confirmed eligible, included in the study, completing follow-up, and analysed            | Page 8-10, Results/ Section “Patient characteristics”, paragraph #1; Table 1                                                                                                                                                                                                                     |
|                   |     | (b) Give reasons for non-participation at each stage                                                                                                                                                         | Page 8-10, Results/ Section “Patient characteristics”, paragraph #1; Table 1                                                                                                                                                                                                                     |
|                   |     | (c) Consider use of a flow diagram                                                                                                                                                                           | Figure 1                                                                                                                                                                                                                                                                                         |
| Descriptive data  | 14* | (a) Give characteristics of study participants (eg demographic, clinical, social) and information on exposures and potential confounders                                                                     | Page 8-10, Results/ Section “Patient characteristics”, paragraph #1; Table 1;                                                                                                                                                                                                                    |
|                   |     | (b) Indicate number of participants with missing data for each variable of interest                                                                                                                          | Page 8-10, Results/ Section “Patient characteristics”, paragraph #1; Supplementary Table S2; Supplementary Figure S3-4;                                                                                                                                                                          |
|                   |     | (c) Summarise follow-up time (eg, average and total amount)                                                                                                                                                  | Page 9-10, Table 1                                                                                                                                                                                                                                                                               |
| Outcome data      | 15* | Report numbers of outcome events or summary measures over time                                                                                                                                               | Page 9-10, Table 1                                                                                                                                                                                                                                                                               |
| Main results      | 16  | (a) Give unadjusted estimates and, if applicable, confounder-adjusted estimates and their precision (eg, 95% confidence interval). Make clear which confounders were adjusted for and why they were included | Page 11-13, Results/ Section “Independent prognostic variables and relative importance”; Results/ Section “Construction and validation of the nomograms”; Results/ Section “Risk discrimination and online calculators”; Figure 2-7; Supplementary Figure S1-4, 5-7, 9; Supplementary Table S3-4 |
|                   |     | (b) Report category boundaries when continuous variables were categorized                                                                                                                                    | Supplementary Figure S8; Supplementary Table S5                                                                                                                                                                                                                                                  |
|                   |     | (c) If relevant, consider translating estimates of relative risk into absolute risk for a meaningful time period                                                                                             | Not applicable                                                                                                                                                                                                                                                                                   |
| Other analyses    | 17  | Report other analyses done—eg analyses of subgroups and interactions, and sensitivity analyses                                                                                                               | Supplementary Figure S10-11                                                                                                                                                                                                                                                                      |
| <b>Discussion</b> |     |                                                                                                                                                                                                              |                                                                                                                                                                                                                                                                                                  |
| Key results       | 18  | Summarise key results with reference to study objectives                                                                                                                                                     | Page 13-15, Discussion, paragraph #1-#4                                                                                                                                                                                                                                                          |
| Limitations       | 19  | Discuss limitations of the study, taking into account sources of potential bias or                                                                                                                           | Page 15-16, Discussion, paragraph #5                                                                                                                                                                                                                                                             |



|                          |    |                                                                                                                                                                            |                                         |
|--------------------------|----|----------------------------------------------------------------------------------------------------------------------------------------------------------------------------|-----------------------------------------|
|                          |    | imprecision. Discuss both direction and magnitude of any potential bias                                                                                                    |                                         |
| Interpretation           | 20 | Give a cautious overall interpretation of results considering objectives, limitations, multiplicity of analyses, results from similar studies, and other relevant evidence | Page 13-16, Discussion, paragraph #1-#5 |
| Generalisability         | 21 | Discuss the generalisability (external validity) of the study results                                                                                                      | Page 15-16, Discussion, paragraph #5    |
| <b>Other information</b> |    |                                                                                                                                                                            |                                         |
| Funding                  | 22 | Give the source of funding and the role of the funders for the present study and, if applicable, for the original study on which the present article is based              | Page 17, Funding                        |

\*Give information separately for exposed and unexposed groups.

**Note:** An Explanation and Elaboration article discusses each checklist item and gives methodological background and published examples of transparent reporting. The STROBE checklist is best used in conjunction with this article (freely available on the Web sites of PLoS Medicine at <http://www.plosmedicine.org/>, Annals of Internal Medicine at <http://www.annals.org/>, and Epidemiology at <http://www.epidem.com/>). Information on the STROBE Initiative is available at <http://www.strobe-statement.org>.

## TRIPOD Checklist: Prediction Model Development and Validation

| Section/Topic                | Item Page | Checklist |                                                                                                                                                                                                  | Item                                                                                          |
|------------------------------|-----------|-----------|--------------------------------------------------------------------------------------------------------------------------------------------------------------------------------------------------|-----------------------------------------------------------------------------------------------|
| Title and abstract           |           |           |                                                                                                                                                                                                  |                                                                                               |
| Title                        | 1         | D;<br>V   | Identify the study as developing and/or validating a multivariable prediction model, the target population, and the outcome to be predicted.                                                     | Page 1, Title                                                                                 |
| Abstract                     | 2         | D;<br>V   | Provide a summary of objectives, study design, setting, participants, sample size, predictors, outcome, statistical analysis, results, and conclusions.                                          | Page 3, Abstract                                                                              |
| Introduction                 |           |           |                                                                                                                                                                                                  |                                                                                               |
| Back-ground and objectives   | 3a        | D;<br>V   | Explain the medical context (including whether diagnostic or prognostic) and rationale for developing or validating the multivariable prediction model, including references to existing models. | Page 5, Introduction, paragraphs 1-3                                                          |
|                              | 3b        | D;<br>V   | Specify the objectives, including whether the study describes the development or validation of the model or both.                                                                                | Page 5, Introduction, paragraphs 3                                                            |
| Methods                      |           |           |                                                                                                                                                                                                  |                                                                                               |
| Source of data               | 4a        | D;<br>V   | Describe the study design or source of data (e.g., randomized trial, cohort, or registry data), separately for the development and validation data sets, if applicable.                          | Page 6-7, Methods/ Source of databases;Methods/ Feature selection                             |
|                              | 4b        | D;<br>V   | Specify the key study dates, including start of accrual; end of accrual; and, if applicable, end of follow-up.                                                                                   | Page 6, Methods/ Inclusion and exclusion Criteria                                             |
| Participants                 | 5a        | D;<br>V   | Specify key elements of the study setting (e.g., primary care, secondary care, general population) including number and location of centres.                                                     | Page 6, Methods/ Inclusion and exclusion Criteria                                             |
|                              | 5b        | D;<br>V   | Describe eligibility criteria for participants.                                                                                                                                                  | Page 6, Methods/ Inclusion and exclusion Criteria                                             |
|                              | 5c        | D;<br>V   | Give details of treatments received, if relevant.                                                                                                                                                | Not applicable                                                                                |
| Outcome                      | 6a        | D;<br>V   | Clearly define the outcome that is predicted by the prediction model, including how and when assessed.                                                                                           | Page 6, Methods/ Inclusion and exclusion Criteria                                             |
|                              | 6b        | D;<br>V   | Report any actions to blind assessment of the outcome to be predicted.                                                                                                                           | Not applicable                                                                                |
| Predictors                   | 7a        | D;<br>V   | Clearly define all predictors used in developing or validating the multivariable prediction model, including how and when they were measured.                                                    | Page 6, Methods/ Inclusion and exclusion Criteria                                             |
|                              | 7b        | D;<br>V   | Report any actions to blind assessment of predictors for the outcome and other predictors.                                                                                                       | Not applicable                                                                                |
| Sample size                  | 8         | D;<br>V   | Explain how the study size was arrived at.                                                                                                                                                       | Page 6, Methods/ Inclusion and exclusion Criteria; Figure 1                                   |
| Missing data                 | 9         | D;<br>V   | Describe how missing data were handled (e.g., complete-case analysis, single imputation, multiple imputation) with details of any imputation method.                                             | Page 8, Methods/ Statistical analysis                                                         |
| Statistical analysis methods | 10a       | D         | Describe how predictors were handled in the analyses.                                                                                                                                            | Page 7-8, Methods/ Construction and validation of the nomograms;Methods/ Statistical analysis |
|                              | 10b       | D         | Specify type of model, all model-building procedures (including any predictor selection), and method for internal validation.                                                                    | Page 7-8, Methods/ Construction and validation of the nomograms                               |
|                              | 10c       | V         | For validation, describe how the predictions were calculated.                                                                                                                                    | Page 7-8, Methods/ Construction and validation of the nomograms                               |
|                              | 10d       | D;<br>V   | Specify all measures used to assess model performance and, if relevant, to compare multiple models.                                                                                              | Page 7-8, Methods/ Construction and validation of the nomograms                               |

|                            |         |         |                                                                                                                                                                                                       |                                                                                                             |
|----------------------------|---------|---------|-------------------------------------------------------------------------------------------------------------------------------------------------------------------------------------------------------|-------------------------------------------------------------------------------------------------------------|
|                            | 10<br>e | V       | Describe any model updating (e.g., recalibration) arising from the validation, if done.                                                                                                               | Page 7-8, Methods/ Construction and validation of the nomograms                                             |
| Risk groups                | 11      | D;<br>V | Provide details on how risk groups were created, if done.                                                                                                                                             | Page 7-8, Methods/ Construction and validation of the nomograms                                             |
| Development vs. validation | 12      | V       | For validation, identify any differences from the development data in setting, eligibility criteria, outcome, and predictors.                                                                         | Page 7-8, Methods/ Construction and validation of the nomograms; Table 1                                    |
| <b>Results</b>             |         |         |                                                                                                                                                                                                       |                                                                                                             |
| Participants               | 13<br>a | D;<br>V | Describe the flow of participants through the study, including the number of participants with and without the outcome and, if applicable, a summary of the follow-up time. A diagram may be helpful. | Page 8-10, Results/ Patient characteristics; Table 1                                                        |
|                            | 13<br>b | D;<br>V | Describe the characteristics of the participants (basic demographics, clinical features, available predictors), including the number of participants with missing data for predictors and outcome.    | Page 8-10, Results/ Patient characteristics; Table 1; Supplementary Table S1-2; Supplementary Figure S3-4   |
|                            | 13c     | V       | For validation, show a comparison with the development data of the distribution of important variables (demographics, predictors and outcome).                                                        | Page 9-10, Table 1                                                                                          |
| Model development          | 14<br>a | D       | Specify the number of participants and outcome events in each analysis.                                                                                                                               | Page 9-10, Table 1                                                                                          |
|                            | 14<br>b | D       | If done, report the unadjusted association between each candidate predictor and outcome.                                                                                                              | Page 11, Results/ Independent prognostic variables and relative importance; Supplementary Table S3-4        |
| Model specification        | 15<br>a | D       | Present the full prediction model to allow predictions for individuals (i.e., all regression coefficients, and model intercept or baseline survival at a given time point).                           | Figure 2; Supplementary Table S3-5; Supplementary Figure S12-14                                             |
|                            | 15<br>b | D       | Explain how to use the prediction model.                                                                                                                                                              | Figure 2; Supplementary Table S5; Supplementary Figure S12-14                                               |
| Model performance          | 16      | D;<br>V | Report performance measures (with CIs) for the prediction model.                                                                                                                                      | Page 11-12, Results/ Construction and validation of the nomograms; Figure 3-7; Supplementary Figure S5-7, 9 |
| Model-updating             | 17      | V       | If done, report the results from any model updating (i.e., model specification, model performance).                                                                                                   | Page 12-13, Results/ Risk discrimination and online calculators; Supplementary Figure S12-14                |
| <b>Discussion</b>          |         |         |                                                                                                                                                                                                       |                                                                                                             |
| Limitations                | 18      | D;<br>V | Discuss any limitations of the study (such as nonrepresentative sample, few events per predictor, missing data).                                                                                      | Page 15-16, Discussion, paragraph 5                                                                         |
| Interpretation             | 19<br>a | V       | For validation, discuss the results with reference to performance in the development data, and any other validation data.                                                                             | Page 15, Discussion, paragraph 4                                                                            |
|                            | 19<br>b | D;<br>V | Give an overall interpretation of the results, considering objectives, limitations, results from similar studies, and other relevant evidence.                                                        | Page 13-16, Discussion, paragraph 1-5                                                                       |
| Implications               | 20      | D;<br>V | Discuss the potential clinical use of the model and implications for future research.                                                                                                                 | Page 16, Conclusions                                                                                        |
| <b>Other information</b>   |         |         |                                                                                                                                                                                                       |                                                                                                             |
| Supplementary information  | 21      | D;<br>V | Provide information about the availability of supplementary resources, such as study protocol, Web calculator, and data sets.                                                                         | Page 12-13, Results/ Risk discrimination and online calculators                                             |
| Funding                    | 22      | D;<br>V | Give the source of funding and the role of the funders for the present study.                                                                                                                         | Page 17, Funding                                                                                            |

\*Items relevant only to the development of a prediction model are denoted by D, items relating solely to a validation of a prediction model are denoted by V, and items relating to both are denoted D;V. We recommend using the TRIPOD Checklist in conjunction with the TRIPOD Explanation and Elaboration document.
